# Supplementary material for: High-contrast luminescence dependent on polymorphism and mechanochromism of AIE-active (4-(phenothiazin-10-yl)phenyl)(pyren-1-yl)methanone
Source: Royal Society of Chemistry journal article supplement (doi:10.1039/c9tc05064g), 2020-01-01
Supplement: c9tc05064g1.pdf [file c9tc05064g1.pdf]

## ***Electronic Supplementary Information (ESI)***

### **Materials and Instruments**

In this work, all the chemicals and reagents were purchased from commercial sources and used as received without further purification.  $^1\text{H}$  and  $^{13}\text{C}$  NMR spectra were measured on a Bruker AV 500 spectrometer in deuterated solvent ( $\text{CDCl}_3$  or  $\text{CD}_2\text{Cl}_2$ ) at room temperature, and the tetramethylsilane (TMS) was tested as internal standard. High resolution mass spectra (HRMS) were recorded on a GCT premier CAB048 mass spectrometer operating in MALDI-TOF mode. Single crystal X-ray diffraction intensity data were collected at 170 K on Bruker-Nonices Smart Apex CCD detector diffractometer with graphite monochromated  $\text{MoK}\alpha$  radiation. Processing of the intensity data was carried out using the SAINT and SADABS routines, and the structure and refinement were conducted using the SHELTL suite of X-ray programs (version 6.10). UV-vis absorption spectra were measured on a Shimadzu UV-2600 spectrophotometer. Photoluminescence (PL) spectra were recorded on a Horiba Fluoromax-4 spectrofluorometer. Fluorescence quantum yields ( $\Phi_{\text{F}}$ ) were measured using a Hamamatsu absolute PL quantum yield spectrometer C11347 Quantaaurus\_QY. Fluorescence lifetimes were determined with a Hamamatsu C11367-11 Quantaaurus-Tau time-resolved spectrometer. The compression experimentation was carried out by Sapphire-anvil cell, and the corresponding PL spectra were collected using Quanta Master 40 spectrometer that under reflection mode, and excitation wavelength was 380 nm.

### **X-Ray crystallography**

**Crystal data for Py-BP-PTZ (CB, CCDC 1838711):**  $\text{C}_{35}\text{H}_{21}\text{NOS}$ ,  $M_{\text{W}} = 503.59$ , monoclinic,  $\text{P2}_1/\text{c}$ ,  $a = 18.1738(15)$ ,  $b = 11.7952(10)$ ,  $c = 11.7756(10)$  Å,  $\beta = 101.034(3)^\circ$ ,  $V = 2477.6(4)$  Å<sup>3</sup>,  $Z =$

4,  $D_c = 1.350 \text{ g cm}^{-3}$ ,  $\mu = 0.161 \text{ mm}^{-1}$  (MoK $\alpha$ ,  $\lambda = 0.71073$ ),  $F(000) = 1048$ ,  $T = 172(2) \text{ K}$ ,  $2\theta_{\text{max}} = 25.36^\circ(98.5\%)$ , 12904 measured reflections, 4477 independent reflections ( $R_{\text{int}} = 0.0679$ ), GOF on  $F^2 = 1.081$ ,  $R_1 = 0.1119$ ,  $wR_2 = 0.1799$  (all data),  $\Delta e$  0.513 and  $-0.317 \text{ e}\text{\AA}^3$ .

**Crystal data for Py-BP-PTZ (CG, CCDC 1838713):**  $\text{C}_{35}\text{H}_{21}\text{NOS}$ ,  $M_W = 503.59$ , monoclinic,  $P2_1/c$ ,  $a = 17.840(3)$ ,  $b = 11.7145(16)$ ,  $c = 11.7425(15) \text{ \AA}$ ,  $\beta = 98.217(6)^\circ$ ,  $V = 2428.8(6) \text{ \AA}^3$ ,  $Z = 4$ ,  $D_c = 1.377 \text{ g cm}^{-3}$ ,  $\mu = 0.165 \text{ mm}^{-1}$  (MoK $\alpha$ ,  $\lambda = 0.71073$ ),  $F(000) = 1048$ ,  $T = 173(2) \text{ K}$ ,  $2\theta_{\text{max}} = 24.50^\circ(98.7\%)$ , 13784 measured reflections, 3983 independent reflections ( $R_{\text{int}} = 0.0894$ ), GOF on  $F^2 = 1.181$ ,  $R_1 = 0.1334$ ,  $wR_2 = 0.2468$  (all data),  $\Delta e$  0.593 and  $-0.415 \text{ e}\text{\AA}^3$ .

### Additional Spectra

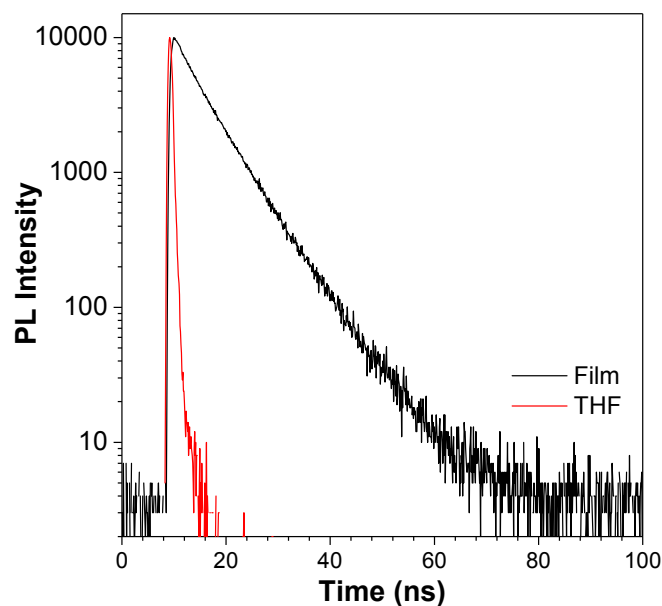

**Fig. S1** PL decay profiles of Py-BP-PTZ in THF solutions and in neat films.

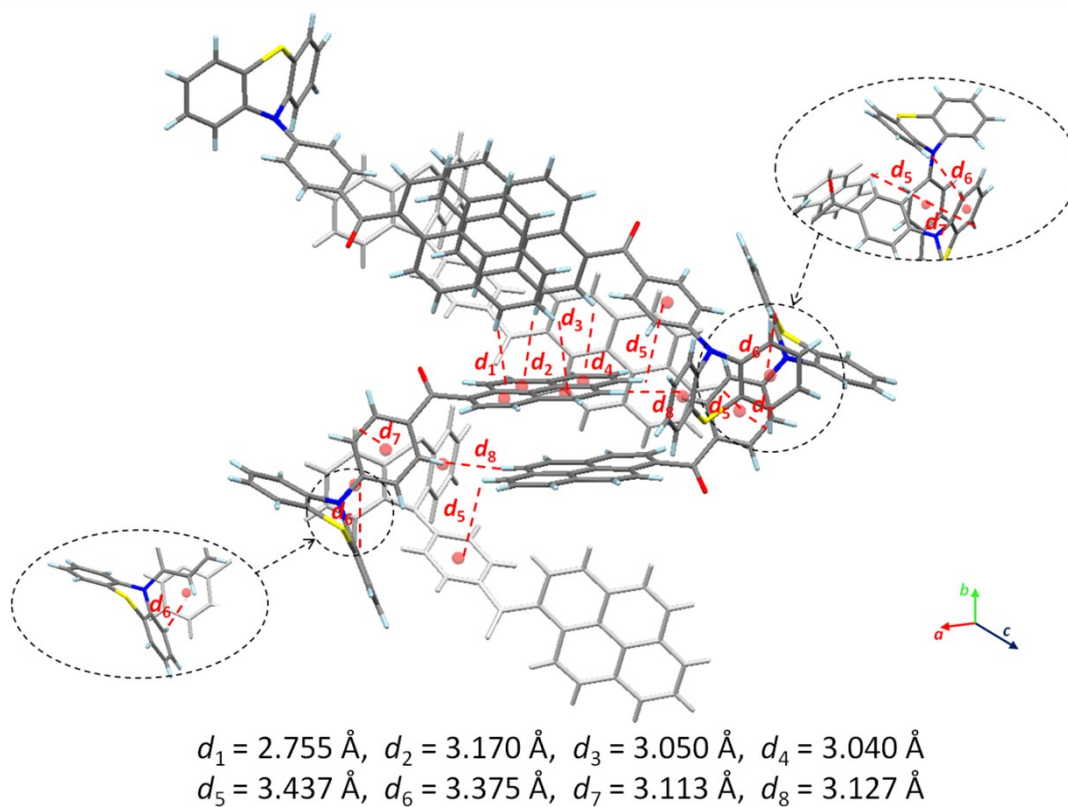

**Fig. S2** The packing pattern and weak interactions of CB in the crystal.

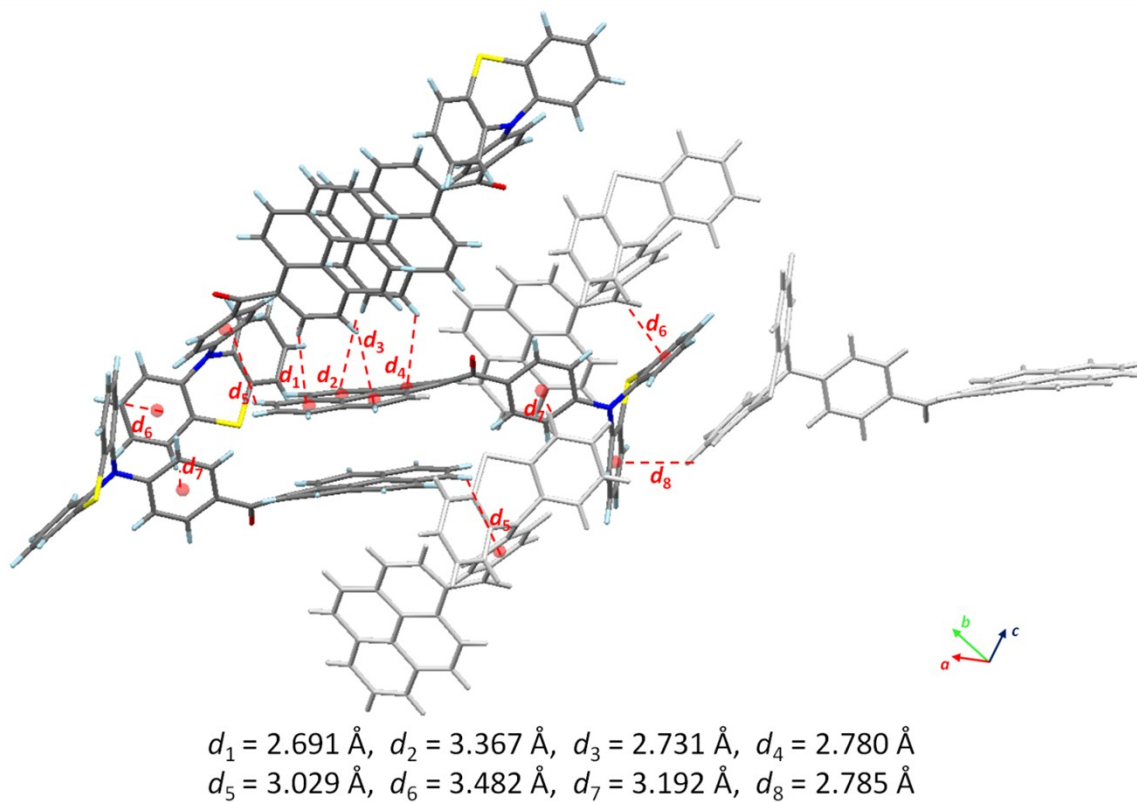

**Fig. S3** The packing pattern and weak interactions of CG in the crystal.

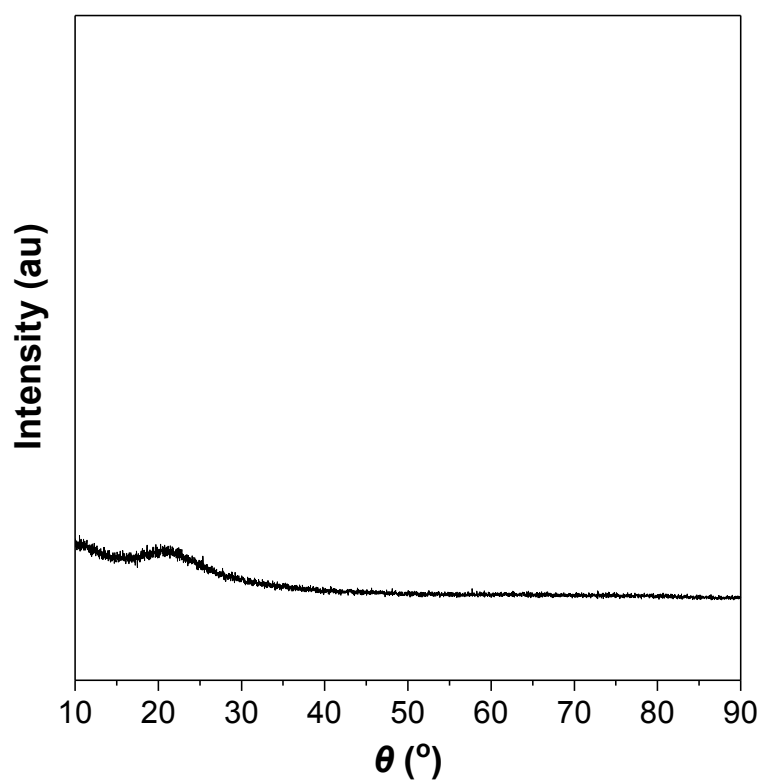

**Fig. S4** The PXRD diffractogram of the amorphous film of Py-BP-PTZ.

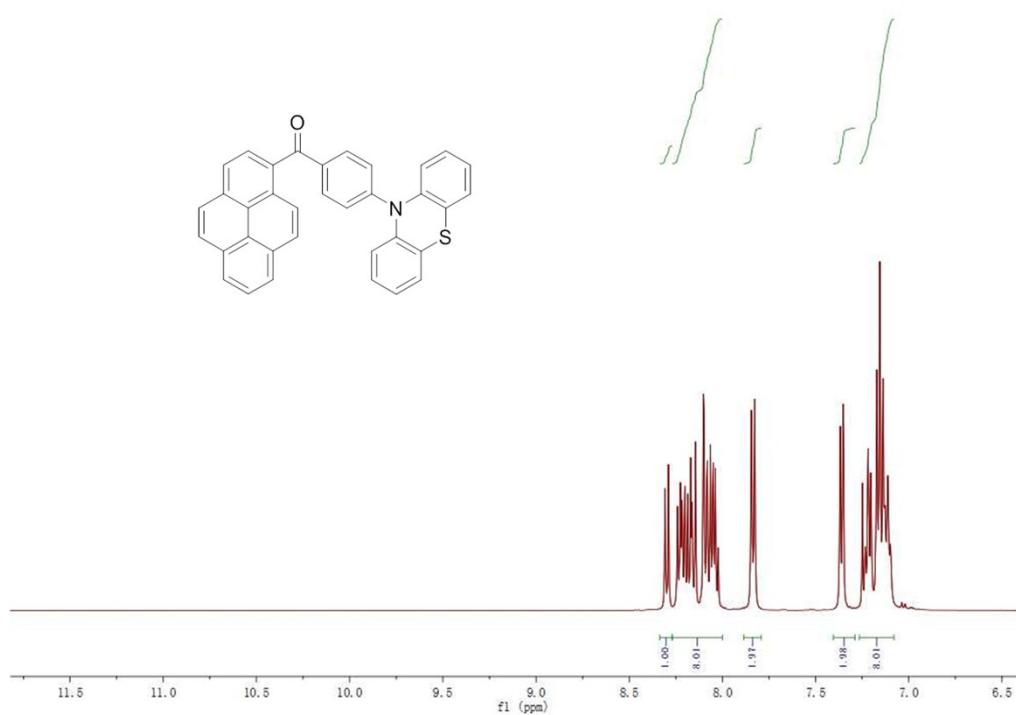

**Fig. S5**  $^1\text{H}$  NMR spectrum of Py-BP-PTZ in  $\text{CDCl}_3$ .

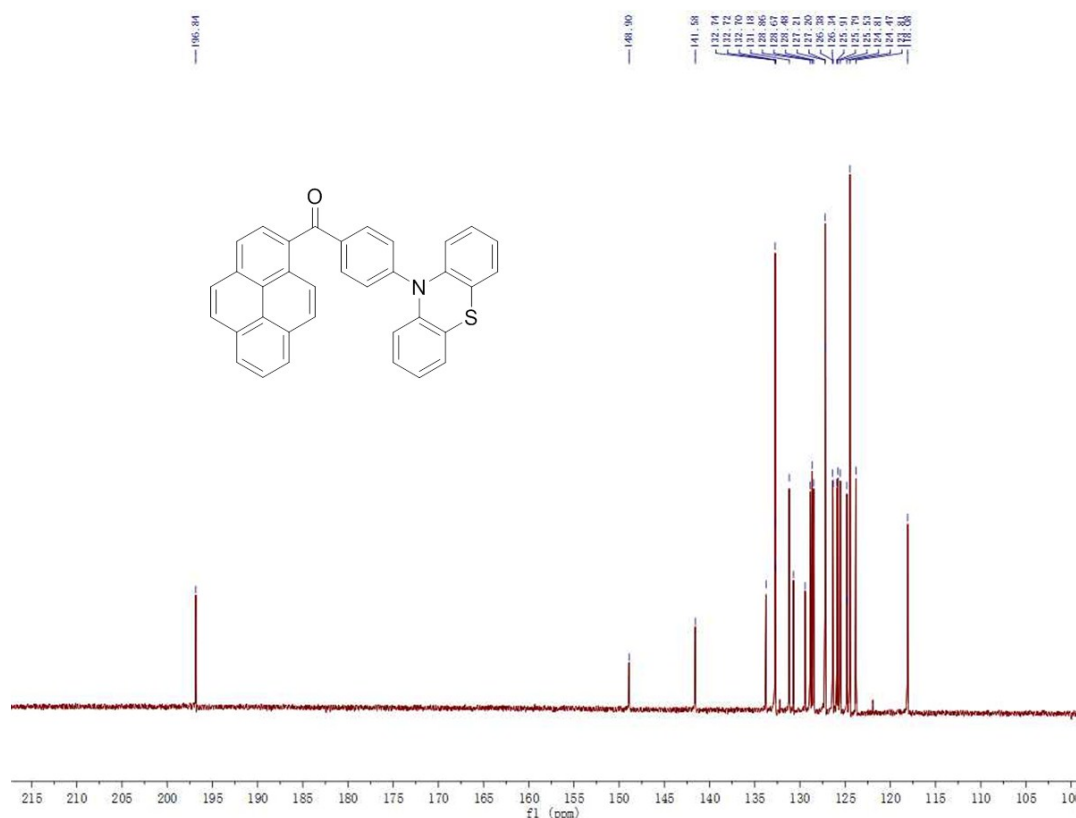

**Fig. S6**  $^{13}\text{C}$  NMR spectrum of Py-BP-PTZ in  $\text{CDCl}_3$ .

## Additional Data

**Table. S1** Photophysical properties of Py-BP-PTZ.

| Compound  | $\lambda_{\text{abs}}^a$ (nm) | $\lambda_{\text{em}}$ (nm) |                   | $\Phi_{\text{PL}}^c$ (%) |      | $\alpha_{\text{AIE}}^d$ | $\tau^e$ (ns) ( $k_{\text{r}}[10^8 \text{ s}^{-1}]$ , $k_{\text{IC}}[10^8 \text{ s}^{-1}]$ ) |                     |
|-----------|-------------------------------|----------------------------|-------------------|--------------------------|------|-------------------------|----------------------------------------------------------------------------------------------|---------------------|
|           | ( $\epsilon/10^4$ )           | soln <sup>a</sup>          | film <sup>b</sup> | soln                     | film |                         | soln                                                                                         | film                |
| Py-BP-PTZ | 347 (2.90)                    | 606                        | 555               | 0.4                      | 4.7  | 11.75                   | 0.64 (0.063, 15.563)                                                                         | 1.89 (0.249, 5.042) |

<sup>a</sup> In dilute THF solution ( $10^{-5} \text{ M}$ ),  $\epsilon$  = molar absorptivity ( $\text{mol}^{-1} \text{ L cm}^{-1}$ ).

<sup>b</sup> Spin-coated film on quartz plate. Solvent: THF.

<sup>c</sup> Fluorescence quantum yield, determined by a calibrated integrating sphere at room temperature in nitrogen.

<sup>d</sup> Values of AIE effect, calculated by  $\Phi_{\text{PL}}(\text{film}) / \Phi_{\text{PL}}(\text{soln})$ .

<sup>e</sup> Fluorescence lifetime, measured at room temperature in nitrogen,  $k_{\text{r}}$  = radiative transition rate ( $k_{\text{r}} = \Phi_{\text{PL}} / \tau$ ),  $k_{\text{IC}}$  = internal conversion decay rate ( $k_{\text{IC}} = (1 - \Phi_{\text{PL}}) / \tau$ ).

**Table S2** Data of crystal structures for CB and CG.

| Crystal | $d_{\pi-\pi}^a$ (Å) | $\Delta x^b$ |          | Overlap ratio (%) |         |         |
|---------|---------------------|--------------|----------|-------------------|---------|---------|
|         |                     | horizontal   | vertical | $R^c$             | $R_l^d$ | $R_s^e$ |
| CB      | 3.459               | 2.058        | 0.034    | 52.32             | 70.60   | 86.20   |
| CG      | 3.485               | 0.966        | 1.640    | 44.59             | 99.30   | 66.16   |

<sup>a</sup> Interplanar distances between the overlapped pyrene planes.

<sup>b</sup> Horizontal and vertical displacements between the overlapped pyrene planes, with one of the pyrene moieties as a reference.

<sup>c</sup> The overlapped area divided by the whole area of the mean pyrene rings.

<sup>d</sup>  $R_l = [l - \Delta x(\text{horizontal})] / l$ .

<sup>e</sup>  $R_s = [s - \Delta x(\text{vertical})] / s$ .
